# Supplementary material for: A Comparison between the Lower Critical Solution Temperature Behavior of Polymers and Biomacromolecules
Source: MDPI journal article supplement (doi:10.3390/physchem2010005), 2022-03-18
Supplement: s1 [file s1]

Archive with 1 entries (1 files):
- physchem-1621877-supplementary.pdf
